# Supplementary material for: Selection criteria for SNP loci to maximize robustness of high-resolution melting analysis for plant breeding
Source: PubMed Central journal article supplement — Breed Sci. 2018 Sep 4;68(4):488–98. doi: 10.1270/jsbbs.18048 (PMC6198901; doi:10.1270/jsbbs.18048), 2018-09-04
Supplement: 68_18048_3.pdf [file 68_18048_3.pdf]

Following contains 5 scripts and parameter tables for

<VCF\_to\_HRMprimer\_step1.pl>, <TD\_table.txt>, <VCF\_to\_HRMprimer\_step2\_expl.pl>, <VCF\_to\_HRMprimer\_noNNNs.pl>, <VCF\_to\_HRMprimer\_NNNsHRM.pl> and <VCF\_to\_HRM\_blast.pl>

Search command will help you to find the each scripts with their names. Relationship for each scripts is summarized in the flow chart in Supplemental figure 1.

```
#VCF_to_HRMprimer_step2_expl.pl
#
#####
# Insall of Bioperl is needed.
# How to use.
# perl VCF_to_HRMprimer_step1.pl path_to_sequence_data input_vcf_file > output_file
# perl VCF_to_HRMprimer_step1.pl C:\Glyma1Glyma1.fa 170912TF_HC_SNP.vcf > 180316conf.txt
#####

use Bio::DB::Fasta;

my $lengh = 200;
my $half_lengh = $lengh * 0.5;

my $fastafile = $ARGV[0];#
my $varientfile = $ARGV[1];#

my $db = Bio::DB::Fasta->new($fastafile);

open(my $fh, "<", $varientfile)
  or die "Cannot open $varientfile: $!";

while(my $line = readline $fh)
{
  chomp $line;
  if($line=~/[A-Z]+, [A-Z]+)/ {next}
  my $readline = $line;
  my @readline = split(/¥s+/, $readline);

  my $CHROM = $readline[0];
  my $POS = $readline[1];
  my $ID = $readline[2];
  my $REF = $readline[3];
  my $ALT = $readline[4];
  my $QUAL = $readline[5];
  my $FILTER = $readline[6];
  my $INFO = $readline[7];
  my $FORMAT = $readline[8];
  my $BAM = $readline[9];
  #my $ID = $readline[10];

  my $varient;
  if($line=~/#/) {
    $INDEX = $BAM;
    next}
  $val = length("$REF")-length("$ALT");
  if($val>0) {$varient = "DEL"} #DELETION
  if($val=0) {$varient = "SNP"} #SNP
  if($val<0) {$varient = "INS"} #INSERT

  my $start = $POS - $half_lengh;
  my $end = $POS + $half_lengh;
  my $seq = $db->seq($CHROM, $start => $end);# (ID, first nucleotide=>end nucleotide)
  my $alt_seq = "not RFLP";

  my $startenz = $POS - 5;
  my $endenz = $POS + 5;

  my $seqenz = $db->seq($CHROM, $startenz => $endenz);# (ID, first nucleotide=>end nucleotide)
```

```

my $seq1enz = substr($seqenz, 0 , 5 );
my $seq2enz = substr($seqenz, 5 + 1);
my $alt_seqenz = "$seq1enz$ALT$seq2enz";
my $ref_seqenz = "$seq1enz$REF$seq2enz";

if($varient=~ /SNP/)
{

}

print "$CHROM\t$POS\t$seq\t$varient\t$REF\t$ALT\t$INDEX\t$salt_seq\t$ref_seqenz\t$salt_seqenz\n";

}

#end of VCF_to_HRMprimer_step1.pl

#####
#TD_table.txt

AA -1.2 -1 -7.9 -22.2
TT -1.2 -1 -7.9 -22.2
AT -0.9 -0.88 -7.2 -20.4
TA -0.9 -0.58 -7.2 -21.3
CA -1.7 -1.45 -8.5 -22.7
TG -1.7 -1.45 -8.5 -22.7
GT -1.5 -1.44 -8.4 -22.4
AC -1.5 -1.44 -8.4 -22.4
CT -1.5 -1.28 -7.8 -21
AG -1.5 -1.28 -7.8 -21
GA -1.5 -1.3 -8.2 -22.2
TC -1.5 -1.3 -8.2 -22.2
CG -2.8 -2.17 -10.6 -27.2
GC -2.3 -2.24 -9.8 -24.4
GG -2.1 -1.84 -8 -19.9
CC -2.1 -1.84 -8 -19.9
C 1.7 0.98 0.1 -2.8
G 1.7 0.98 0.1 -2.8
A 1.7 1.03 2.3 4.1
T 1.7 1.03 2.3 4.1

#end of TD_table.txt

#####

#VCF_to_HRMprimer_step2_expl.pl

#####
##
## PATH to primer3_core is necessary.
##
## perl VCF_to_HRMprimer_step2_expl.pl 170628out1.txt > 170926AF_HRMout_12tr_Final.txt
#####

#####
%SUGI=();
%UNIF=();

$file1="TD_table.txt";

open FILE1, $file1 or die "not found your $file1 containing the data for thermodynamics of nuclotides.\n";

while($line=<FILE1>){
    chomp $line;
    ($nuc, $sugi, $unif)=split(/\t/, $line);
    $SUGI{$nuc}=$sugi;
    $UNIF{$nuc}=$unif;
}

close(FILE1);
#####

```

```

$listfile=shift @ARGV;
open(FILE,$listfile) or die "not found your file.¥n";

while($line=<FILE>){
  chomp $line;
  if($line=~/[ATGCNX],[ATGCNX]/){next}
  ($a,$x,$b,$c,$d,$e,$f,$g,$h,$i,$j,$k,$l,$m,$n,$o,$dcap_enz_seq,$dcap_enz_name,$dcap)=split(/¥t/, $line);
  push @name, $a;
  push @position, $x;
  push @seq, $b;
  push @motif, $c;
  push @ref, $d;
  push @alt, $e;
}

$number=@name;#
$seq_num=0;#
$range =("50-100");#
$target=101;#

print "CHR", "¥t", "POS", "¥t", "SEQ", "¥t", "REF", "¥t", "ALT", "¥t", "TYPE", "¥t", "PRODUCT_SIZE", "¥t", "FW_NAME", "¥t", "FW_SEQ", "
¥t", "RV_NAME", "¥t", "RV_SEQ", "¥t", "DELTA_G_REF_PRODUCT", "¥t", "DELTA_G_ALT_PRODUCT", "¥n";

for($i;$i<$number;++$i){#

  $seq_num++;#

  $val = length($ref[$i]) - length($alt[$i]);#
  $length = length($seq[$i]);#
  $subs=$ref[$i].$alt[$i];#

  if($val==0 && $subs=~m/AC|AG|TG|TC|GA|GT|CT|CA|GC|CG|AT|TA/i){#Transversion型の

    $seq[$i]=~s/¥x0D¥x0A$|¥x0D$|¥x0A$//;#

    $file=sprintf "test.tmp";#
    $fileout=sprintf "$name[$i]_¥position[$i]_out.tmp";#

    open FILE1,">$file";#

    print FILE1 "SEQUENCE_ID¥=$name[$i]_¥position[$i]¥n";
    print FILE1 "SEQUENCE_TEMPLATE¥=$seq[$i]¥n";
    print FILE1 "SEQUENCE_TARGET=". "$target". ",1", "¥n";

    print FILE1 "PRIMER_TASK=generic¥n";
    print FILE1 "PRIMER_PICK_LEFT_PRIMER=1¥n";
    print FILE1 "PRIMER_PICK_INTERNAL_OLIGO=0¥n";
    print FILE1 "PRIMER_PICK_RIGHT_PRIMER=1¥n";
    print FILE1 "PRIMER_OPT_SIZE=25¥n";
    print FILE1 "PRIMER_MIN_SIZE=18¥n";
    print FILE1 "PRIMER_MAX_SIZE=30¥n";
    print FILE1 "PRIMER_PRODUCT_SIZE_RANGE=$range¥n";
    print FILE1 "PRIMER_NUM_NS_ACCEPTED=1¥n";
    print FILE1 "PRIMER_NUM_RETURN=1¥n";
    print FILE1 "PRIMER_FILE_FLAG=1¥n";
    print FILE1 "PRIMER_EXPLAIN_FLAG=1¥n";
    print FILE1 "PRIMER_MAX_POLY_X=3¥n";
    print FILE1 "¥=¥n";
    close(FILE1);

    system "primer3_core <$file> $fileout";

    $dcount=0;

    open FILE2,$fileout;

    while($line=<FILE2>){

      $line=~s/¥x0D¥x0A$|¥x0D$|¥x0A$//;#改行コードの削除

```

```

        if ($line =~ m/PRIMER_LEFT_?d*_SEQUENCE?=/) {$fw=$'; ++$dcount;}
        if ($line =~ m/PRIMER_RIGHT_?d*_SEQUENCE?=/) {$rv=$'; ++$dcount;}
        if ($line =~ m/PRIMER_LEFT_?d*=/) {($m, $n)=split(/?/, $'); $fw_name="$name[$i]". "_". "$position[$i]". "_". "$m". "_fw"; ++
$dcount;}#
        if ($line =~ m/PRIMER_RIGHT_?d*=/) {($m, $n)=split(/?/, $'); $rv_name="$name[$i]". "_". "$position[$i]". "_". "$m". "_rv"; ++
+$dcount;}
        if ($line =~ m/PRIMER_PAIR_?d*_PRODUCT_SIZE?=/) {$p_size=$', ++$dcount;}

    }

    if ($dcount==5) {

        #####
        (undef, undef, $fw_m, undef)=split(/?/, $fw_name);

        $ref_target_seq=$seq[$i];

        $alt_target_seq=$seq[$i];
        substr($alt_target_seq, 100, 1, $alt);

        $ref_amp_seq=$ref_target_seq;
        $ref_amp_seq1=substr($ref_amp_seq, $fw_m, $p_size);

        $alt_amp_seq=$alt_target_seq;
        $alt_amp_seq1=substr($alt_amp_seq, $fw_m, $p_size);

        #print $ref_amp_seq1, "\n";
        #print $alt_amp_seq1, "\n";

        # $ref_dg_sug=&DELTA_G($ref_amp_seq1, %SUGI);
        # $alt_dg_sug=&DELTA_G($alt_amp_seq1, %SUGI);
        $ref_dg_unif=&DELTA_G($ref_amp_seq1, %UNIF);
        $alt_dg_unif=&DELTA_G($alt_amp_seq1, %UNIF);

        print $ref_dg_unif, "\t", $alt_dg_unif;

        #####

        print $name[$i], "\t", $position[$i], "\t", $seq[$i], "\t", $ref[$i], "\t", $alt[$i], "\t", $motif[$i], "\t", $p_size, "\t",
$fw_name, "\t", $fw, "\t", $rv_name, "\t", $rv, "\t", $ref_dg_unif, "\t", $alt_dg_unif, "\n"; # "\t", $blast_fw, "\t", $blast_rv,

        close(FILE2);

        unlink($fileout);
        unlink("test.tmp");
    } else {

        #print $name[$i], "\t", $position[$i], "\t", $ref[$i], "\t", $alt[$i], "\t", $motif[$i], "\n";
        close(FILE2);

        unlink($fileout);
        unlink("test.tmp");
    }

}

#####
sub BLAST{
    my $l_count=0;
    my $p_name=$_[0];
    my $p_seq=$_[1];
    my $out="blastinput.txt";
    my $bout="blastout.txt";
    my $db="C:\YGYmal\YGYmal.fa";

    open(NEW, "> $out");

```

```

print NEW ">", "$p_name", "\n$p_seq\n";
close(NEW);

system "blastn.exe -query $out -db C:\YYGlyma1\YYGlyma1.fa -outfmt 6 -max_target_seqs 10 -out $bout -evaluate 0.01 -task
blastn-short";

open (FILE1, $bout) or die "not found your file $bout.\n";
while($line2=<FILE1>){
    ++$l_count;
}

close(FILE1);
unlink($out);
unlink($bout);

return ($l_count);
}

#####
sub DELTA_G {
my ($t_seq, $table) = @_;#####
my %TABLE=%$table;
my @t_seq=split(/, $t_seq);
my $init_f=0;
my $init_r=0;
my $t_length=length($t_seq);
my $nn=();
my $delta_g=0;
my $i=0;

$init_f=$TABLE{$t_seq[0]};
$init_r=$TABLE{$t_seq[$t_length-1]};

for($i=0;$i<$t_length-1;++$i){
    $nn=$t_seq[$i].$t_seq[$i+1];

    $delta_g+=$TABLE{$nn};
}

$delta_g=$delta_g+$init_f+$init_r;

$delta_g;
}
#end of VCF_to_HRMprimer_step2_expl.pl
#####

#VCF_to_HRMprimer_noNNNs.pl

#####
#####
##
## primer3_core is necessary.
##
## perl test4d.pl 170628out1.txt > 170818HRMout_reall_nosub.txt
## perl VCF_to_HRMprimer2.pl 170628out1.txt >170628outHRM2.txt
#####
#####

$listfile=shift @ARGV;
open(FILE, $listfile) or die "not found your file.\n";

while($line=<FILE>){
    chomp $line;
    if($line=~/[ATGCNX], [ATGCNX]/){next}#
    ($a, $x, $b, $c, $d, $e)=split(/#/ , $line);
    push @name, $a;
    push @position, $x;
}

```

```

push @seq, $b;
push @motif, $c;
push @ref, $d;
push @alt, $e;
}

$number=@name;#
$seq_num=0;#
$range = ("50-100");#
$target=101;#
%case1=();
%case2=();

#####
%UNIF=();
%UNIF=();

$file1="TD_table.txt";

open FILE1, $file1 or die "not found your $file1.\n";

while($line=<FILE1>){
  chomp $line;
  ($nuc, $UNIF, $unif)=split(/¥t/, $line);
  $UNIF{$nuc}=$UNIF;
  $UNIF{$nuc}=$unif;
}

close(FILE1);
#####

for($i;$i<$number;++$i){#

  $seq_num++;#

  $val = length($ref[$i]) - length($alt[$i]);#
  $length = length($seq[$i]);#
  $subs=$ref[$i].$alt[$i];#

  #if($val==0 && $subs=~m/AC|AG|TG|TC|GA|GT|CT|CA|CG/i){#Transversion Type
  if($val==0 && $subs=~m/AC|AG|TG|TC|GA|GT|CT|CA|GC|CG|AT|TA/i){#

    $seq[$i]=~s/¥x0D¥x0A$|¥x0D$|¥x0A$//;#

#####

#####CASE1
  @seq_array=split(//, $seq[$i]);

  $ref_triplet=$seq_array[99].$ref[$i].$seq_array[101];
  $alt_triplet=$seq_array[99].$alt[$i].$seq_array[101];

  $ori_ref_seq=$seq[$i];
  $c_ori_ref_seq=&compseq($seq[$i]);
  $ori_alt_seq=$seq[$i];

  substr($ori_alt_seq, 100, 1, $alt[$i]);
  $ori_d_ref=&DELTA_G($ori_ref_seq, ¥UNIF);
  $ori_d_alt=&DELTA_G($ori_alt_seq, ¥UNIF);
  $ori_ddg=abs($ori_d_ref - $ori_d_alt);
  $out_ori_ddg=sprintf ("% .3f", $ori_ddg);

  @nuc_array=("A", "T", "G", "C");
  foreach $j (@nuc_array){

    $ref_seq=$seq[$i];
    $sub1=$j.$ref[$i];
    substr($ref_seq, 99, 2, $sub1);

```

```

    $alt_seq=$seq[$i];
    $sub2=$j. $alt[$i];
    substr($alt_seq,99,2,$sub2);

    $combi="$sub1"."_"."$sub2";

$d_ref=&DELTA_G($ref_seq,%UNIF);
$d_alt=&DELTA_G($alt_seq,%UNIF);

$ddg=abs($d_ref-$d_alt);

$case1{$combi}=$ddg;
$ave_dfdt=($d_ref+$d_alt)*0.5;
$case1_dfdt{$combi}=$ave_dfdt;

$case1_eval{$combi}=$ave_dfdt/-100+$ddg;

#print $name[$i], "Yt", $position[$i], "Yt", $combi, $case1{$combi}, "Yt". $d_ref, "Yt", $d_alt, "Yt", "Case1", "Yn";
}

@array1=(sort {$case1_eval{$b} <=> $case1_eval{$a}} keys %case1_eval);
#print $name[$i], "Yt", $position[$i], "Yt", $array1[0], "Yt", $case1{$array1[0]}, "Yt", $case1_eval{$array1[0]}, "Yt", "
Case1", "Yn";

#####CASE2

$c_seq=&compseq($seq[$i]);
$c_ref=&compseq($ref[$i]);
$c_alt=&compseq($alt[$i]);

@c_seq_array=split(/,/,$c_seq);
$c_ref_triplet=$c_seq_array[99]. $c_ref. $seq_array[101];
$c_alt_triplet=$c_seq_array[99]. $c_alt. $seq_array[101];

@nuc_array=("A", "T", "G", "C");
foreach $j (@nuc_array) {

    $c_ref_seq=$c_seq;
    $c_sub1=$j. $c_ref;
    substr($c_ref_seq,99,2,$c_sub1);

    $c_alt_seq=$c_seq;
    $c_sub2=$j. $c_alt;
    substr($c_alt_seq,99,2,$c_sub2);

    $c_combi="$c_sub1"."_"."$c_sub2";

$c_d_ref=&DELTA_G($c_ref_seq,%UNIF);
$c_d_alt=&DELTA_G($c_alt_seq,%UNIF);

$c_ddg=abs($c_d_ref-$c_d_alt);

$case2{$c_combi}=$c_ddg;
$c_ave_dfdt=($c_d_ref+$c_d_alt)*0.5;
$case2_dfdt{$c_combi}=$c_ave_dfdt;

$case2_eval{$c_combi}=$c_ave_dfdt/-100+$c_ddg;

#print $name[$i], "Yt", $position[$i], "Yt", $c_combi, "Yt", $case2{$c_combi}, "Yt". $c_d_ref, "Yt", $c_d_alt, "Yt", "Case2"
, "Yn";
}

@array2=(sort {$case2_eval{$b} <=> $case2_eval{$a}} keys %case2_eval);
#print $name[$i], "Yt", $position[$i], "Yt", $array2[0], "Yt", $case2{$array2[0]}, "Yt", $case2_eval{$array2[0]}, "Yt", "
Case2", "Yn";

if($case1_eval{$array1[0]}>$case2_eval{$array2[0]}) {

    ($f_nuc, $damy)=split(/Y_/,$array1[0]);

    #substr($ori_ref_seq,99,2,$f_nuc);
    $f_seq=$ori_ref_seq;

```

```

$direction="FOR";
$out_dfdt=$case1_dfdt {$array1[0]};
$out_ddg=sprintf ("%3f", $case1 {$array1[0]});
$out_nuc=$array1[0];
}else{

($f_nuc,$damy)=split(/_/, $array2[0]);

#substr($c_ori_ref_seq,99,2,$f_nuc);
$f_seq=$c_ori_ref_seq;
$direction="REV";
$out_dfdt=$case2_dfdt {$array2[0]};
$out_ddg=sprintf ("%3f", $case2 {$array2[0]});
$out_nuc=$array2[0];

}

%case1=();
%case1_dfdt=();
%case1_eval=();
#####
%case2=();
%case2_dfdt=();
%case2_eval=();

#=test
$file=sprintf "test.tmp";#
$fileout=sprintf "$name[$i]_position[$i]_out.tmp";#

open FILE1,">$file";#

print FILE1 "SEQUENCE_ID=$name[$i]_position[$i]\n";
print FILE1 "SEQUENCE_TEMPLATE=$f_seq\n";
print FILE1 "SEQUENCE_TARGET=".$target".",1,"$\n";
print FILE1 "SEQUENCE_FORCE_LEFT_END=99\n";
print FILE1 "PRIMER_TASK=generic\n";
print FILE1 "PRIMER_PICK_LEFT_PRIMER=1\n";
print FILE1 "PRIMER_PICK_INTERNAL_OLIGO=0\n";
print FILE1 "PRIMER_PICK_RIGHT_PRIMER=1\n";
print FILE1 "PRIMER_OPT_SIZE=25\n";
print FILE1 "PRIMER_MIN_SIZE=18\n";
print FILE1 "PRIMER_MAX_SIZE=30\n";
print FILE1 "PRIMER_PRODUCT_SIZE_RANGE=$range\n";
print FILE1 "PRIMER_NUM_NS_ACCEPTED=1\n";
print FILE1 "PRIMER_NUM_RETURN=1\n";
print FILE1 "PRIMER_FILE_FLAG=1\n";
print FILE1 "PRIMER_EXPLAIN_FLAG=1\n";
print FILE1 "$=$\n";
close(FILE1);

system "primer3_core <$file> $fileout";
#print "$f_seq", "\n";

$dcount=0;

open FILE2,$fileout;

while($line=<FILE2>){

$line=~s/\x0D\x0A$|\x0D$|\x0A$//;#

if($line=~m/PRIMER_LEFT_?d*_SEQUENCE?=/){$fw=$'+$dcount;
if($line=~m/PRIMER_RIGHT_?d*_SEQUENCE?=/){$rv=$'+$dcount;
if($line=~m/PRIMER_LEFT_?d*=/){($m,$n)=split(/_/, $');$fw_name="$name[$i]". "_". "position[$i]". "_". "$m". "_fw";++$dcount;}#
if($line=~m/PRIMER_RIGHT_?d*=/){($m,$n)=split(/_/, $');$rv_name="$name[$i]". "_". "position[$i]". "_". "$m". "_rv";++$dcount;}
if($line=~m/PRIMER_PAIR_?d*_PRODUCT_SIZE?=/){$p_size=$'+$dcount;}

}

if($dcount==5){
print $name[$i], "\t", $position[$i], "\t", $ref[$i], "\t", $alt[$i], "\t", $motif[$i], "\t", $p_size, "\t", $fw_name, "\t",

```



```
$fw,"¥t",$rv_name,"¥t",$rv,"¥t",$direction,"¥t",$out_nuc,"¥t",$out_dfdt,"¥t",$out_ddg,"¥t",$ref_triplet,"¥t",
$alt_triplet,"¥t",$ori_d_ref,"¥t",$ori_d_alt,"¥t",$out_ori_ddg,"¥n";
```

```
close(FILE2);
```

```
unlink($fileout);
unlink("test.tmp");
}else{
```

```
#print $name[$i],"¥t",$position[$i],"¥t",$ref[$i],"¥t",$alt[$i],"¥t",$motif[$i],"¥n";
close(FILE2);
```

```
unlink($fileout);
unlink("test.tmp");
}
```

```
#=cut
}
}
```

```
#####
```

```
sub DELTA_G{
my ($t_seq,$table) = @_;#####
my %TABLE=%$table;
my @t_seq=split(//,$t_seq);
my $init_f=0;
my $init_r=0;
my $t_length=length($t_seq);
my $nn=();
my $delta_g=0;
my $i=0;
```

```
$init_f=$TABLE{$t_seq[0]};
$init_r=$TABLE{$t_seq[$t_length-1]};
```

```
for($i=0;$i<$t_length-1;++$i){
$nn=$t_seq[$i].$t_seq[$i+1];
```

```
$delta_g+=$TABLE{$nn};
```

```
}
```

```
$delta_g=$delta_g+$init_f+$init_r;
```

```
$delta_g;
```

```
}
```

```
#####
```

```
sub compseq{
#Complementary sequence
my ($seq) = @_;
$seq=~s/¥x0D¥x0A$|¥x0D$|¥x0A$//;
my $seq_1 = $seq =~ tr/AaTtGgCc/TtAaCcGg/r;
```

```
my $seq_minus = reverse $seq_1;
return "$seq_minus";
```

```
}
```

```
#####
```

```
#end of VCF_to_HRMprimer_noNNNs.pl
```

```
#VCF_to_HRMprimer_NNNsHRM.pl
```

```
#####
```

```
#####
```

```
##
```

```
## primer3_core is necessary.
```

```
##
```

```

## perl VCF_to_HRMprimer_NNNsHRM.pl 180223test.txt > 180223out.txt
#####
#####

$CONC=1;#1uM. 0.5->500nM

#####
%SUGI=();
%UNIF=();

$file1="TD_table.txt";

open FILE1, $file1 or die "not found your $file1 containing the data for thermodyamics of nuclotides.\n";

while($line=<FILE1>){
  chomp $line;
  ($nuc,$sugi,$unif,$delta_H,$delta_S)=split(/¥t/, $line);
  $SUGI{$nuc}=$sugi;
  $UNIF{$nuc}=$unif;
  $DH{$nuc}=$delta_H;
  $DS{$nuc}=$delta_S;
}

close(FILE1);
#####

$listfile=shift @ARGV;
open(FILE,$listfile) or die "not found your file.\n";

while($line=<FILE>){
  chomp $line;
  if($line=~/[ATGCNX],[ATGCNX]/){next}#
  ($a,$x,$b,$c,$d,$e)=split(/¥t/, $line);
  push @name, $a;
  push @position, $x;
  push @seq, $b;
  push @motif, $c;
  push @ref, $d;
  push @alt, $e;
}

$number=@name;#
$seq_num=0;#
$range =("50-100");#
$target=101;#
%case1=();
%case2=();

#####
%UNIF=();
%UNIF=();

$file1="TD_table.txt";

open FILE1, $file1 or die "not found your $file1.\n";

while($line=<FILE1>){
  chomp $line;
  ($nuc,$UNIF,$unif)=split(/¥t/, $line);
  $UNIF{$nuc}=$UNIF;
  $UNIF{$nuc}=$unif;
}

close(FILE1);
#####

print "CHR", "¥t", "POS", "¥t", "SEQ", "¥t", "REF", "¥t", "ALT", "¥t", "TYPE", "¥t", "PRODUCT_SIZE", "¥t", "FW_NAME", "¥t", "FW_SEQ", "
¥t", "RV_NAME", "¥t", "RV_SEQ", "¥t", "DELTA_G_REF_PRODUCT", "¥t", "DELTA_G_ALT_PRODUCT", "¥t", "REF_Tm", "¥t", "ALT_Tm", "¥t", "DIR"
, "¥t", "COMBI_NUC", "¥t", "ddG_withSUB", "¥t", "ddG_NoSUB", "¥t", "REF_triplets", "¥t", "ALT_triplets", "¥n";

```

```

for($i;$i<$number;++$i) {#

    $seq_num++;#Sereal ID.

    $val = length($ref[$i]) - length($alt[$i]);#SNP check. 0 is SNP, not 0 is indel.
    $length = length($seq[$i]);#length of sequence.
    $subs=$ref[$i].$alt[$i];#record of SNP

    if($val==0 && $subs=~m/AC|AG|TG|TC|GA|GT|CT|CA|CG|GC|AT|TA/i) {#
        #print $name[$i], "Yt", $position[$i], "Yt", $val, "Yt", $subs, "Yt", $motif[$i], "Yt", $ref[$i], "Yt", $alt[$i], "Yn";#for
test

        $seq[$i]=~s/Yx0DYx0A$|Yx0D$|Yx0A$//;#Deletion of new line code.

#####

#####CASE1
    @seq_array=split(/, $seq[$i]);

    $ref_triplet=$seq_array[99].$ref[$i].$seq_array[101];
    $alt_triplet=$seq_array[99].$alt[$i].$seq_array[101];

    $ori_ref_seq=$seq[$i];
    $c_ori_ref_seq=&compseq($seq[$i]);
    $ori_alt_seq=$seq[$i];

    substr($ori_alt_seq, 100, 1, $alt[$i]);
    $ori_d_ref=&DELTA_G($ori_ref_seq, Y%UNIF);
    $ori_d_alt=&DELTA_G($ori_alt_seq, Y%UNIF);
    $ori_ddg=abs($ori_d_ref - $ori_d_alt);
    $out_ori_ddg=sprintf ("% .3f", $ori_ddg);

    @nuc_array=("A", "T", "G", "C");
    foreach $j (@nuc_array) {

        $ref_seq=$seq[$i];
        $sub1=$j.$ref[$i];
        substr($ref_seq, 99, 2, $sub1);

        $alt_seq=$seq[$i];
        $sub2=$j.$alt[$i];
        substr($alt_seq, 99, 2, $sub2);

        $combi="$sub1"."_"."$sub2";

        $d_ref=&DELTA_G($ref_seq, Y%UNIF);
        $d_alt=&DELTA_G($alt_seq, Y%UNIF);

        $ddg=abs($d_ref-$d_alt);

        $case1{$combi}=$ddg;
        $ave_dfdt=($d_ref+$d_alt)*0.5;
        $case1_dfdt{$combi}=$ave_dfdt;

        $case1_eval{$combi}=$ave_dfdt/-100+$ddg;

        #print $name[$i], "Yt", $position[$i], "Yt", $combi, $case1{$combi}, "Yt". $d_ref, "Yt", $d_alt, "Yt", "Case1", "Yn";
    }

    @array1=(sort {$case1_eval{$b} <=> $case1_eval{$a}} keys %case1_eval);
    #print $name[$i], "Yt", $position[$i], "Yt", $array1[0], "Yt", $case1{$array1[0]}, "Yt", $case1_eval{$array1[0]}, "Yt", "
Case1", "Yn";

#####CASE2

    $c_seq=&compseq($seq[$i]);
    $c_ref=&compseq($ref[$i]);
    $c_alt=&compseq($alt[$i]);

    @c_seq_array=split(/, $c_seq);
    $c_ref_triplet=$c_seq_array[99].$c_ref.$seq_array[101];
    $c_alt_triplet=$c_seq_array[99].$c_alt.$seq_array[101];

```

```

@nuc_array=("A","T","G","C");
foreach $j (@nuc_array) {

    $c_ref_seq=$c_seq;
    $c_sub1=$j.$c_ref;
    substr($c_ref_seq,99,2,$c_sub1);

    $c_alt_seq=$c_seq;
    $c_sub2=$j.$c_alt;
    substr($c_alt_seq,99,2,$c_sub2);

    $c_combi="$c_sub1"."_"."$c_sub2";

    $c_d_ref=&DELTA_G($c_ref_seq,%UNIF);
    $c_d_alt=&DELTA_G($c_alt_seq,%UNIF);

    $c_ddg=abs($c_d_ref-$c_d_alt);

    $case2{$c_combi}=$c_ddg;
    $c_ave_dfdt=($c_d_ref+$c_d_alt)*0.5;
    $case2_dfdt{$c_combi}=$c_ave_dfdt;

    $case2_eval{$c_combi}=$c_ave_dfdt/-100+$c_ddg;

    #print $name[$i],"Yt",$position[$i],"Yt",$c_combi,"Yt",$case2{$c_combi},"Yt".$c_d_ref,"Yt",$c_d_alt,"Yt","Case2"
, "Yn";
}

@array2=(sort {$case2_eval{$b} <=> $case2_eval{$a}} keys %case2_eval);
#print $name[$i],"Yt",$position[$i],"Yt",$array2[0],"Yt",$case2{$array2[0]},"Yt",$case2_eval{$array2[0]},"Yt","
Case2","Yn";

if($case1_eval{$array1[0]}>$case2_eval{$array2[0]}){

    ($f_nuc,$g_nuc)=split(/Y_/,$array1[0]);

    substr($ori_ref_seq,99,2,$f_nuc);
    $f_seq=$ori_ref_seq;

    substr($ori_ref_seq,99,2,$g_nuc);
    $g_seq=$ori_ref_seq;

    $direction="FOR";
    $out_dfdt=$case1_dfdt{$array1[0]};
    $out_ddg=sprintf("%.3f",$case1{$array1[0]});
    $out_nuc=$array1[0];
}else{

    ($f_nuc,$g_nuc)=split(/Y_/,$array2[0]);

    substr($c_ori_ref_seq,99,2,$f_nuc);
    $f_seq=$c_ori_ref_seq;

    substr($c_ori_ref_seq,99,2,$g_nuc);
    $g_seq=$c_ori_ref_seq;

    $direction="REV";
    $out_dfdt=$case2_dfdt{$array2[0]};
    $out_ddg=sprintf("%.3f",$case2{$array2[0]});
    $out_nuc=$array2[0];

}

%case1=();
%case1_dfdt=();
%case1_eval=();
#####
%case2=();
%case2_dfdt=();
%case2_eval=();

#=test

```

```

$file=sprintf "test.tmp";#Making input file for Primer3.
$fileout=sprintf "$name[$i]_position[$i].out.tmp";#Output file for Primer3

open FILE1,">$file";

print FILE1 "SEQUENCE_ID=$name[$i]_position[$i]\n";
print FILE1 "SEQUENCE_TEMPLATE=$f_seq\n";
print FILE1 "SEQUENCE_TARGET=". "$target". ", 1", "\n";
print FILE1 "SEQUENCE_FORCE_LEFT_END=99\n";
print FILE1 "PRIMER_TASK=generic\n";
print FILE1 "PRIMER_PICK_LEFT_PRIMER=1\n";
print FILE1 "PRIMER_PICK_INTERNAL_OLIGO=0\n";
print FILE1 "PRIMER_PICK_RIGHT_PRIMER=1\n";
print FILE1 "PRIMER_OPT_SIZE=25\n";
print FILE1 "PRIMER_MIN_SIZE=18\n";
print FILE1 "PRIMER_MAX_SIZE=30\n";
print FILE1 "PRIMER_PRODUCT_SIZE_RANGE=$range\n";
print FILE1 "PRIMER_NUM_NS_ACCEPTED=1\n";
print FILE1 "PRIMER_NUM_RETURN=1\n";
print FILE1 "PRIMER_FILE_FLAG=1\n";
print FILE1 "PRIMER_EXPLAIN_FLAG=1\n";
print FILE1 "\n";
close(FILE1);

system "primer3_core <$file> $fileout";
#print "$f_seq", "\n";

$dcount=0;

open FILE2, $fileout;

while($line=<FILE2>){

$line=~s/\x0D\x0A|\x0D|\x0A//;#Deletion of new line code.

if($line=~m/PRIMER_LEFT_?d*_SEQUENCE?=/){$fw=$'+$dcount;
if($line=~m/PRIMER_RIGHT_?d*_SEQUENCE?=/){$rv=$'+$dcount;
if($line=~m/PRIMER_LEFT_?d*=?/){($m,$n)=split(/?/, $');$fw_name="$name[$i]". "_". "position[$i]". "_". "$m". "_fw";++
$dcount;}#
if($line=~m/PRIMER_RIGHT_?d*=?/){($m,$n)=split(/?/, $');$rv_name="$name[$i]". "_". "position[$i]". "_". "$m". "_rv";+
+$dcount;}
if($line=~m/PRIMER_PAIR_?d*_PRODUCT_SIZE=?/){$p_size=$'+$dcount;}

}

if($dcount==5){

(undef, undef, $fw_m, undef)=split(/?/, $fw_name);

$ref_target_seq=$f_seq;

$salt_target_seq=$g_seq;

$ref_amp_seq1=substr($ref_target_seq, $fw_m, $p_size);

$salt_amp_seq1=substr($salt_target_seq, $fw_m, $p_size);

$ref_pp_dg_unif=&DELTA_G($ref_amp_seq1, %UNIF);
$salt_pp_dg_unif=&DELTA_G($salt_amp_seq1, %UNIF);

$ref_dh_unif=&DELTA_G($ref_amp_seq1, %DH);
$salt_dh_unif=&DELTA_G($salt_amp_seq1, %DH);

$ref_ds_unif=&DELTA_G($ref_amp_seq1, %DS);
$salt_ds_unif=&DELTA_G($salt_amp_seq1, %DS);

#print $ref_dh_unif, "\t", $salt_dh_unif, "\t", $ref_ds_unif, "\t", $salt_ds_unif, "\n";

$ref_tm=&TMCALC($ref_dh_unif, $ref_ds_unif, $CONC);
$salt_tm=&TMCALC($salt_dh_unif, $salt_ds_unif, $CONC);

print $name[$i], "\t", $position[$i], "\t", $f_seq, "\t", $ref[$i], "\t", $salt[$i], "\t", $motif[$i], "\t", $p_size, "\t",
$fw_name, "\t", $fw, "\t", $rv_name, "\t", $rv, "\t", $ref_pp_dg_unif, "\t", $salt_pp_dg_unif, "\t", $ref_tm, "\t", $salt_tm, "\t",

```

```
$direction,"¥t",$out_nuc,"¥t",$out_ddg,"¥t",$out_ori_ddg,"¥t",$ref_triplet,"¥t",$alt_triplet,"¥n";
```

```
close(FILE2);
```

```
unlink($fileout);  
unlink("test.tmp");  
}else{
```

```
#print $name[$i],"¥t",$position[$i],"¥t",$ref[$i],"¥t",$alt[$i],"¥t",$motif[$i],"¥n";  
close(FILE2);
```

```
unlink($fileout);  
unlink("test.tmp");  
}
```

```
#=cut  
}  
}
```

```
#####
```

```
sub DELTA_G{  
my ($t_seq,$table) = @_;#####  
my %TABLE=%$table;  
my @t_seq=split(//,$t_seq);  
my $init_f=0;  
my $init_r=0;  
my $t_length=length($t_seq);  
my $nn=();  
my $delta_g=0;  
my $i=0;
```

```
$init_f=$TABLE{$t_seq[0]};  
$init_r=$TABLE{$t_seq[$t_length-1]};
```

```
for($i=0;$i<$t_length-1;++$i){  
$nn=$t_seq[$i].$t_seq[$i+1];
```

```
$delta_g+=$TABLE{$nn};
```

```
}
```

```
$delta_g=$delta_g+$init_f+$init_r;
```

```
$delta_g;
```

```
}
```

```
#####
```

```
sub compseq{  
#Complementary sequence  
my ($seq) = @_  
$seq=~s/¥x0D¥x0A$|¥x0D$|¥x0A$//;  
my $seq_1 = $seq =~ tr/AaTtGgCc/TtAaCcGg/r;  
  
my $seq_minus = reverse $seq_1;  
return "$seq_minus";  
}
```

```
#####
```

```
sub TMCALC{  
my ($dh,$ds,$conc)=@_  
my $tm=0;  
my $ct=$conc/1000000;#if $conc=1, it incdicare 1uM.
```

```
$tm=((1000*$dh)/($ds+1.987*log($ct/4))-273;
```

```
$tm = sprintf("%.2f", $tm);  
$tm;
```

```
}
```

```

#end of VCF_to_HRMprimer_NNNsHRM.pl
#####
#####

#VCF_to_HRM_blast.pl

#/usr/bin/perl

#####
#####
##
## For executing this script, set the PATH to blast+.
## Type "blastn.exe -h", you can confirm a PATH to blast programs on a command prompt.
##
## perl VCF_to_HRM_blast.pl C:\YGlyma1\YGlyma1.fa 170914HRMout_Str.txt > 170914HRMout_final.txt
##
#####
#####

$db=shift @ARGV; #'C:\YGlyma1\YGlyma1.fa';

$out="tempout.txt";
$out="blastout.txt";
$listfile=shift @ARGV;
open(FILE,$listfile) or die "not found your file.\n";

$line=FILE;#

while($line=<FILE>){
    chomp $line;
    open(NEW,"> $out");
    ($a,$x,$seq,$ref,$alt,$mot,$psize,$fw_name,$b,$rv_name,$c)=split(/#/,$line);#Gm01 40354 GAATGCAGCAGACATGTGTACC
    TCTTCTCGAAATGCTGCAGT 337 G C HindIII
    $ID="$a"."_"."$x";
    $ID{$ID}+=1;
    $fw=$ID."_fw";
    $rv=$ID."_rv";
    print NEW ">",$fw,"$b\n",>,$rv,"$c\n";
    close(NEW);
}

#=comment
system "blastn.exe -query $out -db $db -outfmt 6 -max_target_seqs 10 -out $out -evaluate 0.01 -task blastn-short";

open (FILE1,$out) or die "not found your file $out.\n";
while($line2=<FILE1>){
    chomp $line2;
    #print $line2,"$n";
    ($primer,@array)=split(/#/,$line2);
    $primer{$primer}+=1;
}

print $line,"$t";

$k_num=keys %primer;

if($k_num>1){
    foreach $j (sort keys %primer){

        print $primer{$j},"$t";

    }
}
else{
    print "ND","$t","ND","$t";
}

#print $line2,"$n";
%primer=();
close(FILE1);

```

```
    unlink($out);
    unlink($bout);

    print "\n";
}

#=cut

#end of VCF_to_HRM_blast.pl
#####
```
