# Supplementary material for: Selection criteria for SNP loci to maximize robustness of high-resolution melting analysis for plant breeding
Source: PubMed Central journal article supplement — Breed Sci. 2018 Sep 4;68(4):488–98. doi: 10.1270/jsbbs.18048 (PMC6198901; doi:10.1270/jsbbs.18048), 2018-09-04
Supplement: 68_18048_4.pdf [file 68_18048_4.pdf]

Supplemental Text 2.

```
=====
S01_24218289_W0652      CTCACGGTGAAAAATCGTTGGATATATATATATTTAGAAAAATTATGAGCTGTAGTTAGA 60
S01_24218289_Nip       CTCACTGTGAAAAATCATTGGATATATATATTTTAGAAAAATCATGAGCTACAGTTAGG 60
                        *****
S01_24218289_W0652      AGTATGATCGTCTCAAGTTAACATGCGA 88
S01_24218289_Nip       AGTCTGGTCGTCTCAAGTTATCATGCGA 88
                        *** **
>forward primer
ctcactgtgaaaaatcatttggga
>reverse primer
tcgcatgataacttgagacga
5-bp Differences within the PCR products
=====
S01_30614519_W0652      TGGGAGTTCCCATTGATAAAAAAGGATATTGAAAGAAAATTGGAAGGCAGCTGAAAACA 60
S01_30614519_Nip       TGGGAGTTCCCATTGATAAAAAAGGATATTAAGAAAAGATTGGAAGGTAGCTGAAAACA 60
                        *****
S01_30614519_W0652      AAATGGAACATAAGTTAGGCTGCTGTTAGG 90
S01_30614519_Nip       AAATGGAACATAAGTTAGGCTGCTGTCAGG 90
                        *****
>forward primer
tgggagttccattgataaaa
>reverse primer
cctgccagcagcctaactt
4-bp Differences within the PCR products
=====
S01_33174822_W0652      CCCTTTTGTGTCATGGTTCATTTTCACTTTCTCTCTTGTCTACTCTTGCTGAATCA 60
S01_33174822_Nip       CCCTTTTGTGTCATGGTTCATTTTCACTTTCTCTCTTGTCTACTCTTTCTGAATCA 60
                        *****
S01_33174822_W0652      GACTTTGGGGAACCAGATGA 80
S01_33174822_Nip       GACTTTGGGGAACCAGATGA 80
                        *****
>forward primer
CCCTTTTGTGTCATGGTTC
>reverse primer
TCATCTGGTTCCTCAAGTC
3-bp Differences within the PCR products
=====
S02_34760207_W0652      ATCTTAGCCAAAAGCCGAGAAAGGTATGAGTTGCAACGTGCAACCTGCCTGGTTATAT 60
S02_34760207_Nip       ATCTTAGCCAAAAGCCGAGAAAGGTATGAGTTGCTTAGTCCAACCTGCCTGCTGTAT 60
                        *****
S02_34760207_W0652      ACAGAGCGCAGCGCCATCTACTACCCTC 88
S02_34760207_Nip       ACAGAGCGCAGCGCCATCTACTACCCTC 88
                        *****
>forward primer
ATCTTAGCCAAAAGCCGAG
>reverse primer
GAGGGTAGTAGATGGCGCTG
7-bp Differences within the PCR products
=====
S01_420470_W0652      TCGGTGACGTCTCTCTCTCCCCCGCGGTGAGCCCGTGAGGAAGATAAGGGCTACGA 60
S01_420470_Nip       TCGGTGACGTCTCTCTCTCCCCCGCGGTGAGCCCGTGAGGAAGATAAGGGCTACGA 60
                        *****
S01_420470_W0652      TGCGATAAGTGGCTGCTAACTGG 83
S01_420470_Nip       TGAGATAAGTGGCTGCTAACTGG 83
                        ** *****
>forward primer
TCGGTGACGTCTCTCTCT
>reverse primer
CCAGTTGGCAGCCACTTATC
1-bp Difference within the PCR products
=====
S01_40722026_W0652      AGTTGGGGCTAGAAAGTCCACACTAGTAGCAATACCCAACCGTATGCGATGGGACGGC 60
S01_40722026_Nip       AGTTGGGGCTAGAAAGTCCACACTAGTAGCAATACCCAACCGTATGCGATGGAGACGGC 60
                        *****
S01_40722026_W0652      ACGACAACGAGGCTTAAT 78
S01_40722026_Nip       ACGACAACGAGGCTTAAT 78
                        *****
=====
```

```

>forward primer
AGTTGGGCTAGAAAGTGCC
>reverse primer
ATTAAGCCTCGTTGTCGTGC
1-bp Difference within the PCR products
=====
S01_42615916_W0652      TCACGTAATTCTCTTGCTTCTGTATCACATTTGACTTATAAATTACTCATAAATGCTACT 60
S01_42615916_Nip       TCACGTAATTCTCTTGCTTCTGTATCACATTTGACTTATAAATTACTCATAAATGCGACT 60
                        *****
S01_42615916_W0652      CAATTCATGCTGTTTCGTAGTTTCCAAACGATGC 93
S01_42615916_Nip       CAATTCATGCTGTTTCGTAGTTTCCAAACGATGC 93
                        *****

>forward primer
TCACGTAATTCTCTTGCTTCTG
>reverse primer
GCATCGTTTGGAACTACGAA
1-bp Difference within the PCR products
=====
S02_5141593_W0652      GGAATTTCCGGCCTTTGTTTAAGGTGAGAAGGATATCATGTTTCAGTGTCCCGCTTCCAG 60
S02_5141593_Nip       GGAATTTCCGGCCTTTGTTTAAGGTGAGAAGGATATCATGTTTCAGTGTCCCTCTTCCAG 60
                        *****
S02_5141593_W0652      ATGCATCAACAATTCTCT 78
S02_5141593_Nip       ATGCATCAACAATTCTCT 78
                        *****

>forward primer
GGAATTTGGCCTTTGTTT
>reverse primer
AGAGAATTGTTGATGCATCTGG
1-bp Difference within the PCR products
=====
S03_155578_W0652      GACCAATAACTGGCTGTTTGCACAAATTTATCAGTATGCTTCTAGTATAGACTGTTT 60
S03_155578_Nip       GACCAATAACTGGCTGTTTGCACAAATTTATCAGTATACTTCTAGTATAGACTGTTT 60
                        *****
S03_155578_W0652      GGTTTTGGACCAATGTCGC 81
S03_155578_Nip       GGTTTTGGACCAATGTCGC 81
                        *****

>forward primer
GACCAATAACTGGCTGTTTGC
>reverse primer
GCGCATTGGTGTCAAAAAC
2-bp Difference within the PCR products
=====
S03_2547822_W0652      CTCGGATAGCATGCCTCAATTCTCAGGCTGAAGATTCTGCCAGACGGTACATTCTACTGA 60
S03_2547822_Nip       CTCGGATAGCATGCCTCAATTCTCAGGCTGAAGATTCTGCCAGACGGTACATTCTGCTGA 60
                        *****
S03_2547822_W0652      TTCTTGATTAGTTTAGTTTGCAGGTCAAATGGCTT 95
S03_2547822_Nip       TTCTTGATTAGTTTAGTTTGCAGGTCAAATGGCTT 95
                        *****

>forward primer
CTCGGATAGCATGCCTCAAT
>reverse primer
AAGCCATTTGACCTGCAAAC
1-bp Difference within the PCR products
=====
#####

```
